# Supplementary material
Source: publisher site journal article supplement (https://www.spandidos-publications.com/3047/downloadSupplementary)

Figure S1. Association between carcinoma-associated fibroblast volume around cancer cells and SPARC expression. (A) Representative images of FAP immunohistochemical staining. Scale bars, 200  $\mu\text{m}$ . (B) Comparison of FAP-positive area around cancer cells between SPARC-positive and SPARC-negative cases. Data are presented as the mean  $\pm$  SEM.  $^{**}P<0.01$ . FAP, fibroblast-activating protein; SPARC, secreted protein acidic and rich in cysteine.

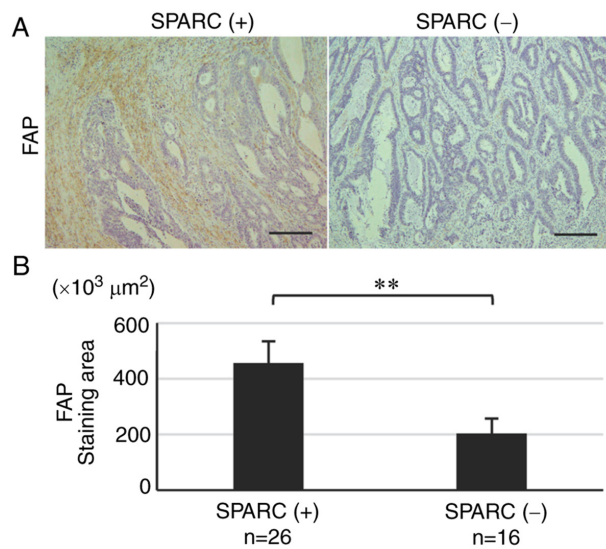

Figure S2. Representative images of orthotopic tumors. White dotted lines surround the tumors. (A) WT. (B) shSPARC. (C) WT + MSCs. (D) shSPARC + MSCs. MSCs, mesenchymal stem cells; sh, short hairpin RNA; SPARC, secreted protein acidic and rich in cysteine; WT, wild-type.

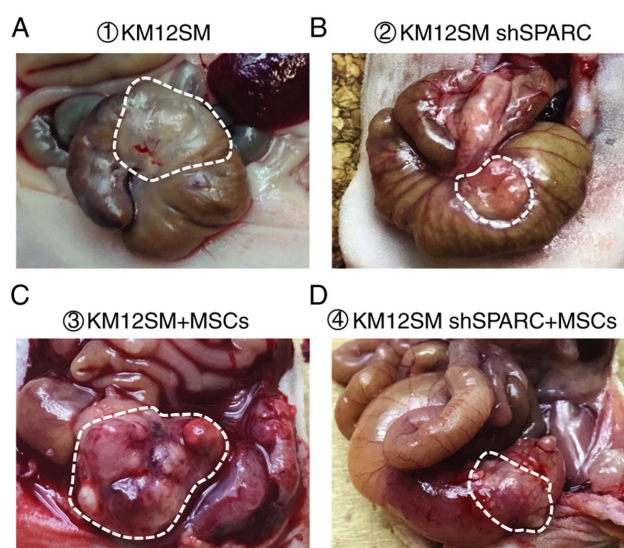

Supplement: Supplementary file 1 [file downloadSupplementary]
